# Supplementary material for: Arg-Leu-Tyr-Glu Suppresses Retinal Endothelial Permeability and Choroidal Neovascularization by Inhibiting the VEGF Receptor 2 Signaling Pathway
Source: PubMed Central journal article supplement — Biomol Ther (Seoul). 2019 May 2;27(5):474–83. doi: 10.4062/biomolther.2019.041 (PMC6720534; doi:10.4062/biomolther.2019.041), 2019-05-02
Supplement: bt-27-474_suppl.pdf [file bt-27-474_suppl.pdf]

**Supplemental Figure 1. RLYE inhibits VEGF-A-induced endothelial cell junction breakage in HRMECs.** HRMECs grown in monolayers were pre-treated with RLYE (0.15 nM) and NMA (1 mM) for 30 min and stimulated with VEGF (10 ng/ml) for 1 h. VE-cadherin,  $\beta$ -catenin, claudin-5, and ZO-1 were immunostained with their specific antibodies and secondary antibodies conjugated to Alexa Fluor 555. Endothelial cell junction proteins were photographed by confocal microscopy (see in Figure 3D and E), and their levels were quantified by ImageJ software (n = 4). \*\* $P < 0.01$ .

**Supplemental Figure 2. FITC and FITC-EYLR do not bind to retinal microvascular endothelial cells in mice.** Mice were intravitreally injected with 2  $\mu$ l of saline 5 h prior to intravitreal administration of FITC (2  $\mu$ l of 1.5 nM) and FITC-EYLR (2  $\mu$ l of 1.5 nM). After 24 h, mice were anesthetized and perfused with 4 % paraformaldehyde. Retinas were isolated, flat-mounted, and stained with isolectin B4-647. Representative Images were photographed by confocal microscopy. Scale bar = 100  $\mu$ m.

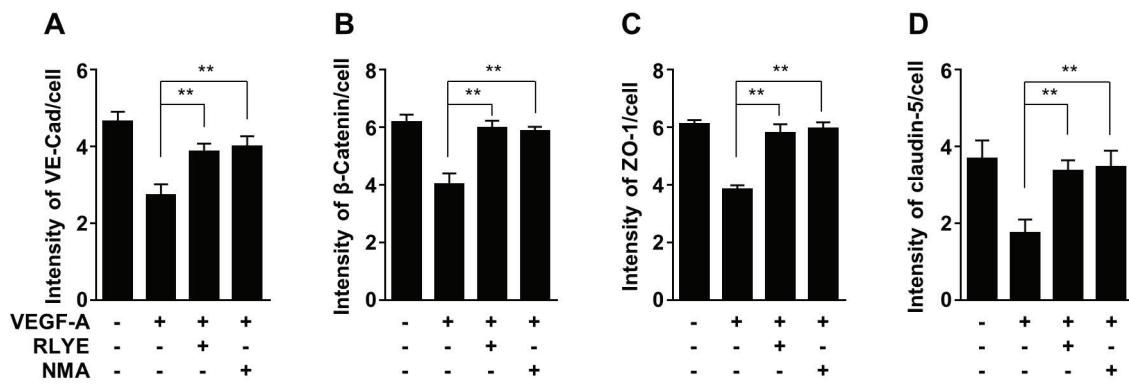

Supplemental Figure 1

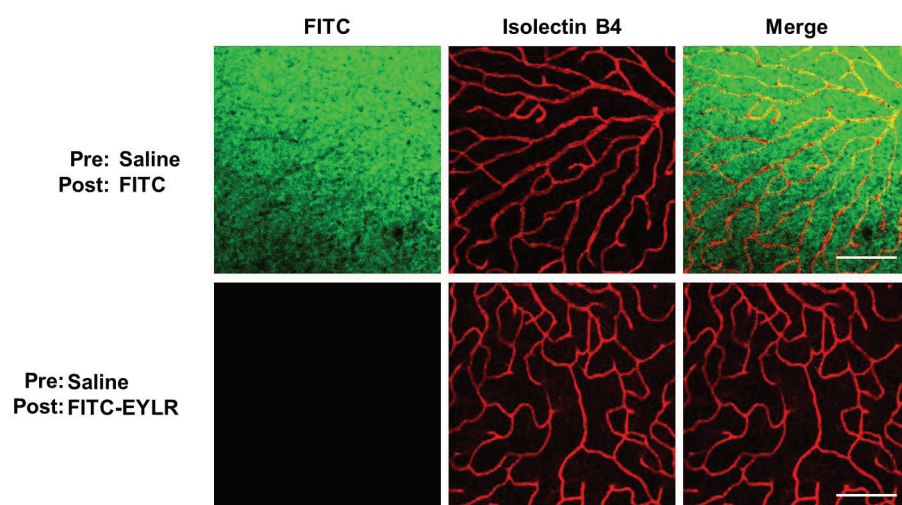

**Supplemental Figure 2**
